# Supplementary material for: Urban Particulate Matter Enhances ROS/IL-6/COX-II Production by Inhibiting MicroRNA-137 in Synovial Fibroblast of Rheumatoid Arthritis
Source: MDPI journal article supplement (doi:10.3390/cells9061378), 2020-06-02
Supplement: s1 [file s1]

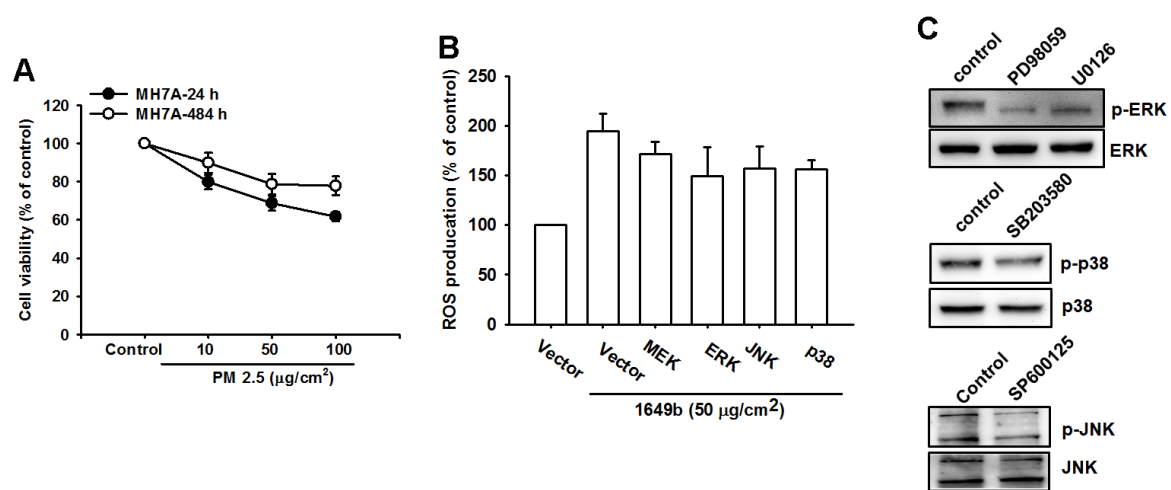

Figure S1.

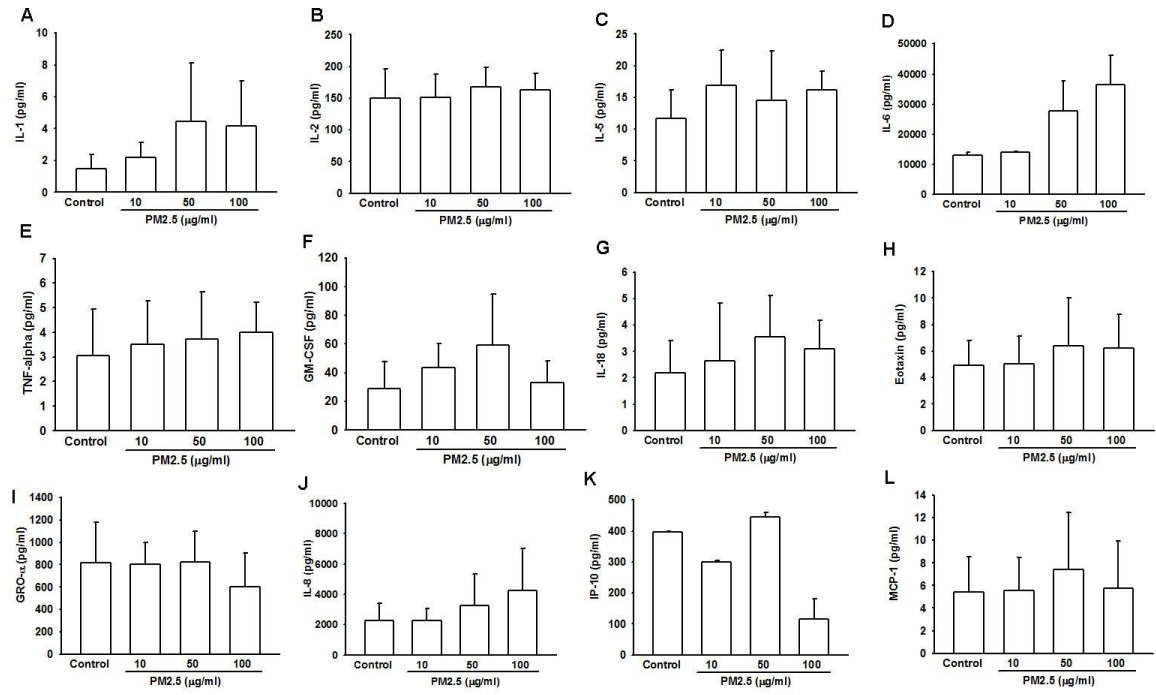

Figure S2
